# Supplementary material
Source: publisher site journal article supplement (https://www.dovepress.com/article/259331)
Supplement: Supplementary file 1 [file get_supplementary_file.php]

**Supplementary Figure 1.** Representative photographs of corneal staining by 3% lissamine green B dye on day 58

| <b>Treatment groups</b>                            | <b>Right eye</b>                                                                    | <b>Left eye</b>                                                                       |
|----------------------------------------------------|-------------------------------------------------------------------------------------|---------------------------------------------------------------------------------------|
| C57Bl6/J normal control                            | 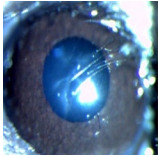   |    |
| NOD diseased control                               |    |    |
| Placebo twice daily                                |    |    |
| Cyclosporine ophthalmic solution 0.09% twice daily |   |   |
| Cyclosporine ophthalmic solution 0.09% once daily  |  |  |
| Cyclosporine ophthalmic emulsion 0.05% twice daily |  |  |
| Ciclosporin ophthalmic emulsion 0.1% once daily    |  |  |

NOD, NOD.B10.H2<sup>b</sup>.

**Supplementary Figure 2.** Levels of interleukin-1 $\beta$ (pg/ml) in lacrimal gland homogenate at day

60

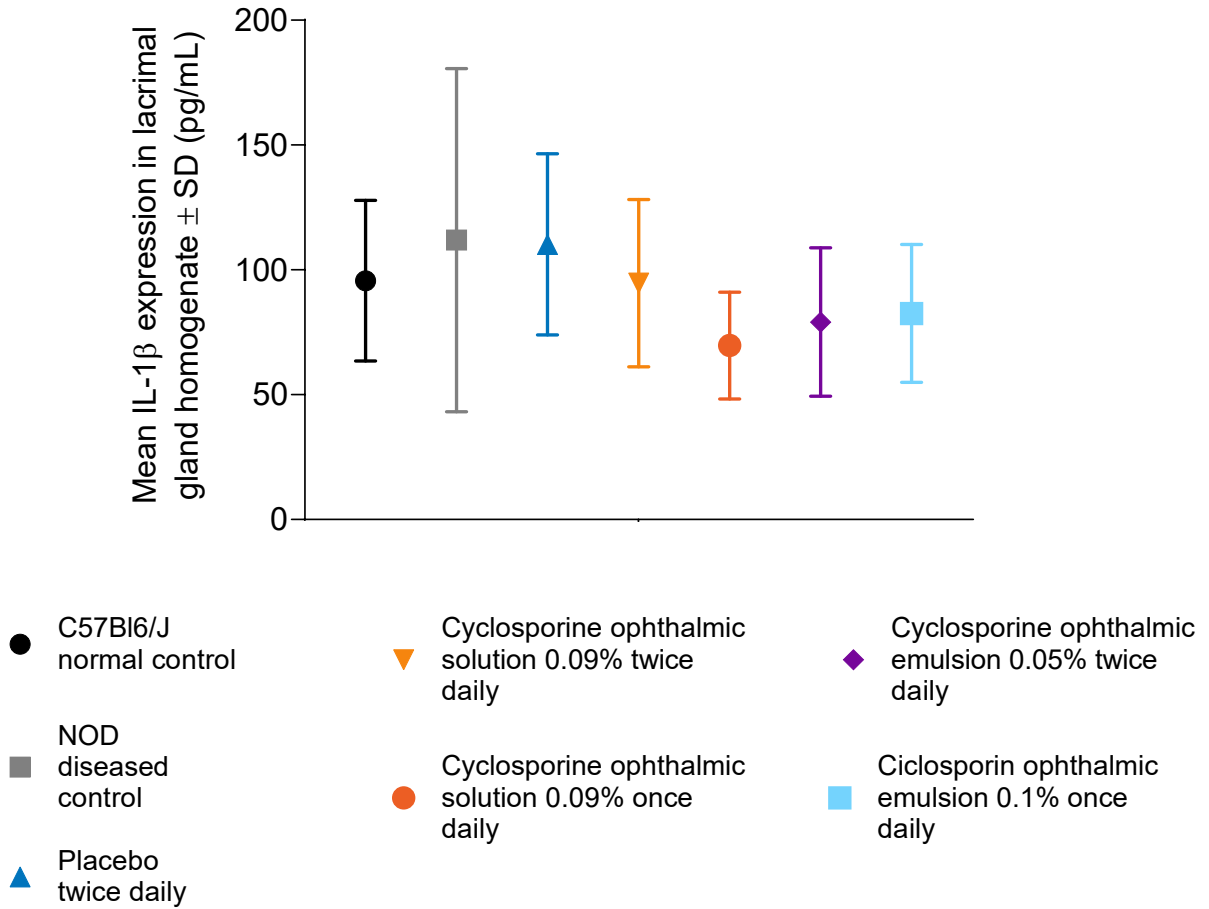

IL, interleukin; NOD, NOD.B10.H2<sup>b</sup>; SD, standard deviation.
